# Supplementary material for: Pharmaceutical salt and salt hydrates of vortioxetine with sulfonic acid to ameliorate the solubility and hygroscopicity via the charge-assisted hydrogen bond assembly
Source: Royal Society of Chemistry journal article supplement (doi:10.1039/d0nj05052k), 2020-12-09
Supplement: d0nj05052k1.pdf [file d0nj05052k1.pdf]

## Supporting Information

### **Pharmaceutical salt and salt hydrates of vortioxetine with sulfonic acid to ameliorate the solubility and hygroscopicity through charge-assisted hydrogen bond assembly**

Rongkai Du,<sup>a</sup> Juan Xu,<sup>b</sup> Jing Li,<sup>a</sup> Lei Zhang,<sup>a</sup> Lifeng Ning,<sup>\*b</sup> and Shan Li,<sup>\*a</sup>

<sup>a</sup> MOE International Joint Laboratory on Synthetic Biology and Medicines, School of Biology and Biological Engineering, South China University of Technology, Guangzhou 510006, P. R. China. E-mail: [lishan@scut.edu.cn](mailto:lishan@scut.edu.cn)

<sup>b</sup> National Research Institute for Family Planning, Beijing 100081, P. R. China. E-mail: [8205956@qq.com](mailto:8205956@qq.com)

\* Corresponding author.

## Table of content:

|           |                                                                                         |
|-----------|-----------------------------------------------------------------------------------------|
| Figure S1 | Experimental and simulated PXRD patterns of VOT and its salts                           |
| Figure S2 | <sup>1</sup> H-NMR spectra of VOT and its salts                                         |
| Figure S3 | FT-IR spectroscopy of VOT and its salts                                                 |
| Figure S4 | PXRD patterns of the residual phases after solubility experiments for VOT and its salts |
| Table S1  | The hydrogen bond metrics of VOT salts                                                  |

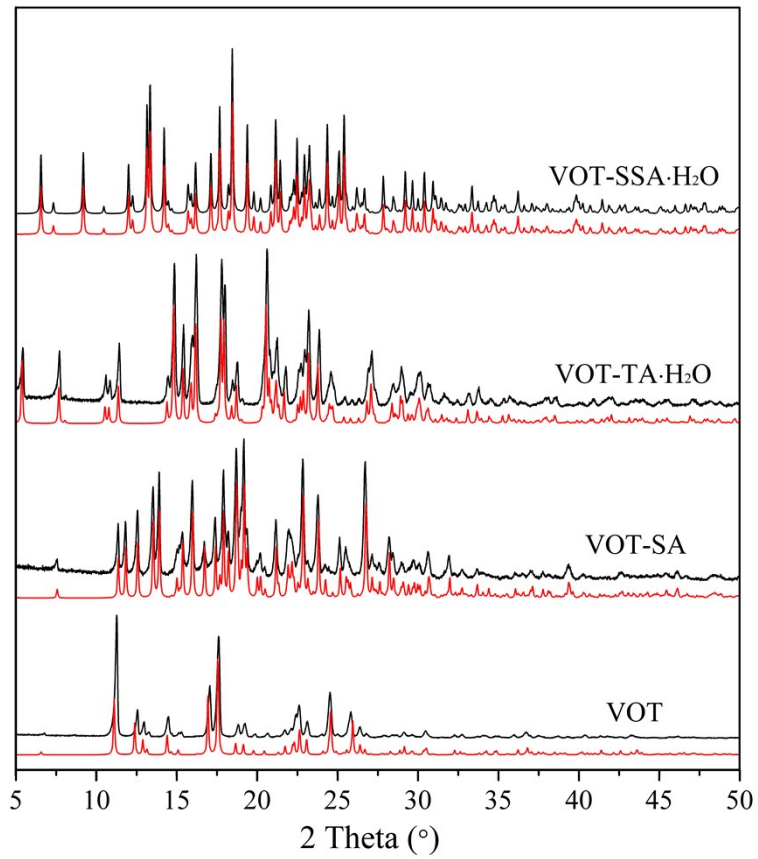

Fig. S1 Overlay of experimental (black) PXRD patterns and the simulated (red) PXRD patterns generated from the single crystal diffraction data.

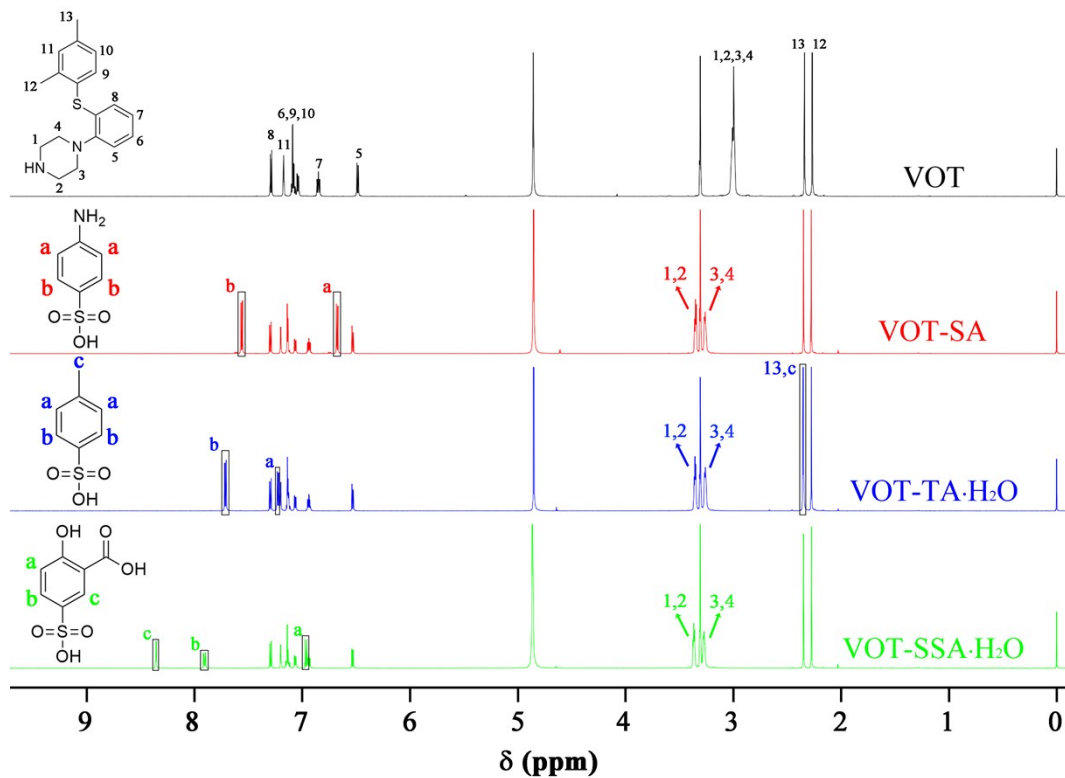

Fig. S2 The  $^1\text{H-NMR}$  spectra of the VOT and its salts.

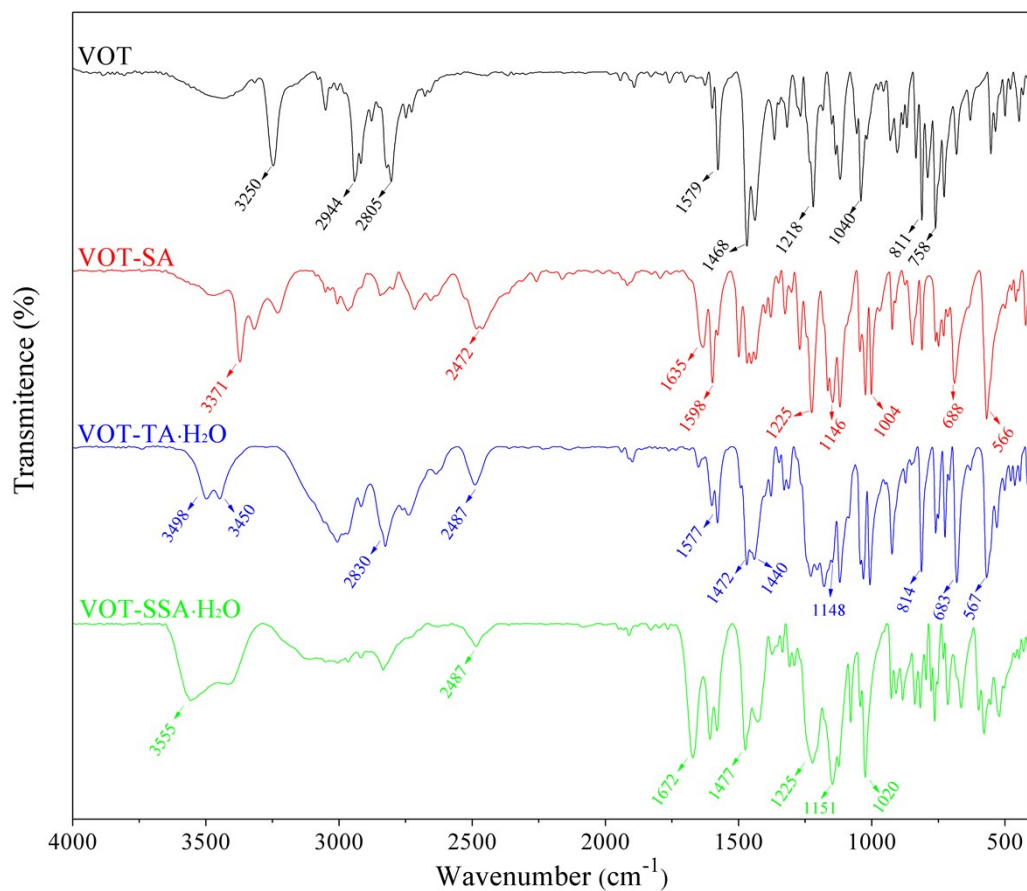

Fig. S3 The FT-IR spectrum of the VOT and its salts.

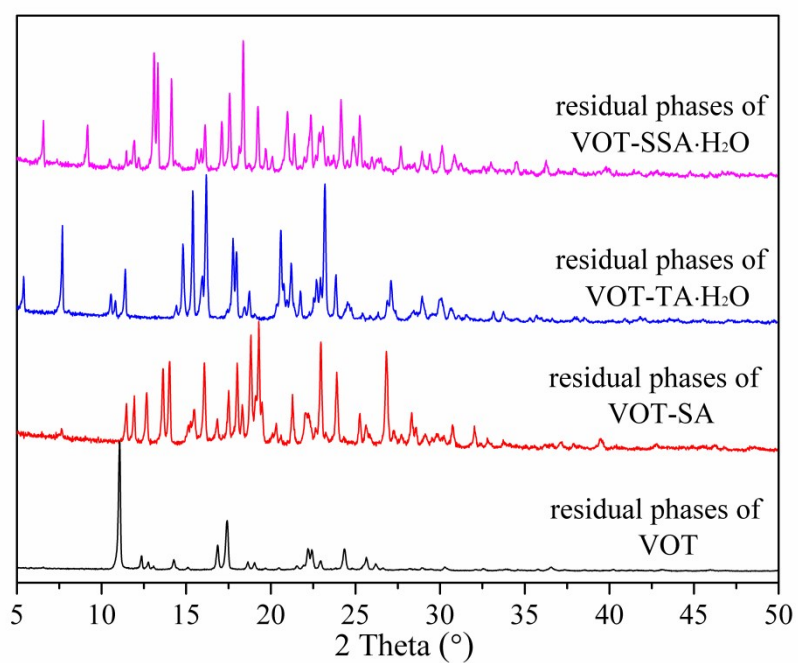

Fig. S4 The PXRD patterns of the residual phases after solubility experiments for VOT and its salts.

Table S1 The hydrogen bond metrics of VOT salts.

| D-H...A                       | d(D-H)(Å) | d(H...A)(Å) | d(D...A)(Å) | ∠DHA(°)   | symmetry code          |
|-------------------------------|-----------|-------------|-------------|-----------|------------------------|
| <b>VOT-SA</b>                 |           |             |             |           |                        |
| N1B-H1BC...O3B                | 0.97      | 1.76        | 2.730(12)   | 177.5     |                        |
| N1B-H1BD...N3B                | 0.97      | 1.91        | 2.881(14)   | 175.6     | [x+1/2, -y+1/2, z]     |
| N3A-H3AC...O1A                | 1.06(10)  | 2.12(11)    | 3.074(14)   | 149(8)    | [x+1/2, -y+1/2, z]     |
| N3A-H3AD...O1B                | 0.81(10)  | 2.49(10)    | 3.215(13)   | 150(9)    | [x, y+1, z]            |
| N3B-H3BC...O2A                | 0.98(12)  | 2.24(12)    | 3.199(13)   | 165(10)   |                        |
| N3B-H3BD...O2B                | 1.02(10)  | 2.15(10)    | 3.017(13)   | 142(7)    | [x-1/2, -y-1/2, z]     |
| N1A-H1AC...N3A                | 0.97(3)   | 1.97(4)     | 2.923(15)   | 167(12)   | [x-1/2, -y+3/2, z]     |
| N1A-H1AD...O3A                | 0.97(3)   | 1.8(2)      | 2.674(13)   | 156(46)   |                        |
| <b>VOT-TA·H<sub>2</sub>O</b>  |           |             |             |           |                        |
| N1-H1C...O2                   | 0.91(3)   | 2.01(3)     | 2.837(3)    | 151(2)    | [x-1/2, -y-1/2, z-1/2] |
| N1-H1D...O3                   | 0.86(3)   | 2.01(3)     | 2.861(3)    | 171(2)    | [-x+2, -y, -z]         |
| O4-H4C...O3                   | 0.88(4)   | 2.00(4)     | 2.870(3)    | 170(3)    | [-x+2, -y, -z]         |
| O4-H4D...O1                   | 0.79(3)   | 2.00(3)     | 2.782(3)    | 170(3)    | [-x+2, -y+1, -z]       |
| <b>VOT-TA</b>                 |           |             |             |           |                        |
| N1A-H1AC...O1B                | 0.97      | 2.10        | 2.928(10)   | 142.3     | [x+1, y, z]            |
| N1A-H1AC...O3B                | 0.97      | 2.27        | 3.078(10)   | 139.8     | [x+1, y, z]            |
| N1A-H1AD...O1A                | 0.97      | 1.85        | 2.810(10)   | 170.2     |                        |
| N1B-H1BC...O3B                | 0.97      | 1.82        | 2.784(9)    | 175.0     |                        |
| N1B-H1BD...O2A                | 0.97      | 2.56        | 3.265(11)   | 129.5     |                        |
| N1B-H1BD...O3A                | 0.97      | 1.87        | 2.789(10)   | 156.7     |                        |
| <b>VOT-SSA·H<sub>2</sub>O</b> |           |             |             |           |                        |
| N2-H2C...O5                   | 0.84(2)   | 2.16(3)     | 2.877(2)    | 143(2)    | [x, y+1, z]            |
| N2-H2C...O7                   | 0.84(2)   | 2.51(2)     | 3.033(2)    | 121.5(19) | [-x+1, -y+2, -z+2]     |
| N2-H2D...O7                   | 0.90(2)   | 1.96(2)     | 2.845(2)    | 169(2)    |                        |
| O1-H1...O4                    | 0.88(3)   | 1.75(3)     | 2.6155(19)  | 166(3)    | [-x, -y+1, -z+2]       |
| O3-H3...O2                    | 0.87(3)   | 1.87(3)     | 2.641(2)    | 148(2)    |                        |
| O3-H3...O6                    | 0.87(3)   | 2.57(2)     | 3.016(2)    | 113(2)    | [-x+1, -y+1, -z+2]     |
| O7-H7A...O4                   | 0.84(3)   | 2.45(3)     | 3.105(2)    | 135(2)    | [x+1, y+1, z]          |
| O7-H7A...O6                   | 0.84(3)   | 2.56(3)     | 3.374(2)    | 162(2)    | [x+1, y+1, z]          |
| O7-H7B...O6                   | 0.83(3)   | 2.04(3)     | 2.861(2)    | 169(3)    | [-x+1, -y+1, -z+2]     |
